# Supplementary material for: Global evaluation of lineage-specific human papillomavirus capsid antigenicity using antibodies elicited by natural infection
Source: PubMed Central journal article supplement (PMC10881982; doi:10.1038/s41467-024-45807-w), 2024-02-21
Supplement: 41467_2024_45807_MOESM1_ESM.pdf [file 41467_2024_45807_MOESM1_ESM.pdf]

**Supplementary Table 1. Seropositivity rates by sample type, disease status, geographic region and lineage**

| Genotype | Variable | Value      | Total (N) | Seronegative (n) | Seropositive (n) | %    | <i>p</i> value |       |
|----------|----------|------------|-----------|------------------|------------------|------|----------------|-------|
| HPV16    | Sample   | Plasma     | 343       | 197              | 146              | 43%  |                |       |
|          | Sample   | Serum      | 232       | 152              | 80               | 34%  | 0.052          |       |
|          | Disease  | Disease    | 470       | 280              | 190              | 40%  |                |       |
|          | Disease  | No Disease | 105       | 69               | 36               | 34%  | 0.244          |       |
|          | Region   | Africa     | 320       | 187              | 133              | 42%  |                |       |
|          | Region   | Americas   | 136       | 80               | 56               | 41%  |                |       |
|          | Region   | Asia       | 113       | 82               | 31               | 27%  |                |       |
|          | Region   | Europe     | 6         | 0                | 6                | 100% | 0.001          |       |
|          | Lineage  | A          | 150       | 104              | 46               | 31%  |                |       |
|          | Lineage  | B          | 112       | 62               | 50               | 45%  |                |       |
|          | Lineage  | C          | 158       | 94               | 64               | 41%  |                |       |
|          | Lineage  | D          | 155       | 89               | 66               | 43%  | 0.078          |       |
|          | HPV18    | Sample     | Plasma    | 220              | 167              | 53   | 24%            |       |
| Sample   |          | Serum      | 107       | 96               | 11               | 10%  | 0.003          |       |
| Disease  |          | Disease    | 156       | 137              | 19               | 12%  |                |       |
| Disease  |          | No Disease | 171       | 126              | 45               | 26%  | 0.001          |       |
| Region   |          | Africa     | 89        | 73               | 16               | 18%  |                |       |
| Region   |          | Americas   | 158       | 119              | 39               | 25%  |                |       |
| Region   |          | Asia       | 78        | 69               | 9                | 12%  |                |       |
| Region   |          | Europe     | 2         | 2                | 0                | 0%   | 0.092          |       |
| Lineage  |          | A          | 197       | 161              | 36               | 18%  |                |       |
| Lineage  |          | B          | 126       | 98               | 28               | 22%  |                |       |
| Lineage  |          | C          | 4         | 4                | 0                | 0%   | 0.418          |       |
| HPV31    |          | Sample     | Plasma    | 255              | 161              | 94   | 37%            |       |
|          |          | Sample     | Serum     | 176              | 125              | 51   | 29%            | 0.089 |
|          | Disease  | Disease    | 98        | 72               | 26               | 27%  |                |       |
|          | Disease  | No Disease | 333       | 214              | 119              | 36%  | 0.090          |       |
|          | Region   | Africa     | 40        | 24               | 16               | 40%  |                |       |
|          | Region   | Americas   | 357       | 239              | 118              | 33%  |                |       |
|          | Region   | Asia       | 23        | 16               | 7                | 30%  |                |       |
|          | Region   | Europe     | 11        | 7                | 4                | 36%  | 0.820          |       |
|          | Lineage  | A          | 148       | 94               | 54               | 36%  |                |       |
|          | Lineage  | B          | 145       | 101              | 44               | 30%  |                |       |
|          | Lineage  | C          | 138       | 91               | 47               | 34%  | 0.534          |       |
|          | HPV33    | Sample     | Plasma    | 134              | 75               | 59   | 44%            |       |
|          |          | Sample     | Serum     | 55               | 31               | 24   | 44%            | 0.961 |
| Disease  |          | Disease    | 52        | 24               | 28               | 54%  |                |       |
| Disease  |          | No Disease | 137       | 82               | 55               | 40%  | 0.090          |       |
| Region   |          | Africa     | 13        | 6                | 7                | 54%  |                |       |
| Region   |          | Americas   | 141       | 80               | 61               | 43%  |                |       |
| Region   |          | Asia       | 23        | 14               | 9                | 39%  |                |       |
| Region   |          | Europe     | 12        | 6                | 6                | 50%  | 0.816          |       |
| Lineage  |          | A          | 149       | 80               | 69               | 46%  |                |       |
| Lineage  |          | B          | 28        | 18               | 10               | 36%  |                |       |
| Lineage  |          | C          | 12        | 8                | 4                | 33%  | 0.437          |       |
| HPV45    |          | Sample     | Plasma    | 180              | 149              | 31   | 17%            |       |
|          |          | Sample     | Serum     | 119              | 114              | 5    | 4%             | 0.001 |
|          | Disease  | Disease    | 109       | 104              | 5                | 5%   |                |       |
|          | Disease  | No Disease | 190       | 159              | 31               | 16%  | 0.003          |       |
|          | Region   | Africa     | 55        | 48               | 7                | 13%  |                |       |
|          | Region   | Americas   | 200       | 171              | 29               | 14%  |                |       |
|          | Region   | Asia       | 42        | 42               | 0                | 0%   |                |       |
|          | Region   | Europe     | 2         | 2                | 0                | 0%   | 0.066          |       |
|          | Lineage  | A          | 150       | 133              | 17               | 11%  |                |       |
|          | Lineage  | B          | 149       | 130              | 19               | 13%  | 0.706          |       |
|          | HPV52    | Sample     | Plasma    | 197              | 98               | 99   | 50%            |       |
|          |          | Sample     | Serum     | 38               | 21               | 17   | 45%            | 0.533 |
|          |          | Disease    | Disease   | 65               | 33               | 32   | 49%            |       |
| Disease  |          | No Disease | 170       | 86               | 84               | 49%  | 0.980          |       |
| Region   |          | Africa     | 25        | 12               | 13               | 52%  |                |       |
| Region   |          | Americas   | 155       | 81               | 74               | 48%  |                |       |
| Region   |          | Asia       | 52        | 24               | 28               | 54%  |                |       |
| Region   |          | Europe     | 3         | 2                | 1                | 33%  | 0.811          |       |
| Lineage  |          | A          | 146       | 75               | 71               | 49%  |                |       |
| Lineage  |          | B          | 35        | 18               | 17               | 49%  |                |       |
| Lineage  |          | C          | 38        | 20               | 18               | 47%  |                |       |
| Lineage  |          | D          | 16        | 6                | 10               | 62%  | 0.752          |       |
| HPV58    |          | Sample     | Plasma    | 162              | 97               | 65   | 40%            |       |
|          | Sample   | Serum      | 37        | 18               | 19               | 51%  | 0.212          |       |
|          | Disease  | Disease    | 51        | 29               | 22               | 43%  |                |       |
|          | Disease  | No Disease | 147       | 85               | 62               | 42%  | 0.688          |       |
|          | Region   | Africa     | 33        | 17               | 16               | 48%  |                |       |
|          | Region   | Americas   | 123       | 70               | 53               | 43%  |                |       |
|          | Region   | Asia       | 42        | 27               | 15               | 36%  |                |       |
|          | Region   | Europe     | 1         | 1                | 0                | 0%   | 0.567          |       |
|          | Lineage  | A          | 149       | 86               | 63               | 42%  |                |       |
|          | Lineage  | B          | 13        | 4                | 9                | 69%  |                |       |
|          | Lineage  | C          | 18        | 10               | 8                | 44%  |                |       |
|          | Lineage  | D          | 19        | 15               | 4                | 21%  | 0.060          |       |

*N*, total number of samples tested; *n*, resulting number of samples testing seropositive or seronegative; *p* value,  $\chi^2$  (Chi squared; 2-sided, exact *p* values) test for differences in proportions

**Supplementary Table 2. Lineage-specific geometric mean (95%CI) neutralization titers**

| Genotype    | Infection lineage | N           | Metric         | PsV-A          | PsV-B         | PsV-C         | PsV-D         |
|-------------|-------------------|-------------|----------------|----------------|---------------|---------------|---------------|
| HPV16       | A                 | 46          | n              | 42             | 43            | 44            | 43            |
|             |                   |             | GMT (95%CI)    | 361 (233-560)  | 381 (253-572) | 346 (233-514) | 321 (216-478) |
|             |                   |             | <i>p value</i> | 0.970          | 0.618         | 0.331         |               |
|             | B                 | 50          | n              | 44             | 46            | 44            | 40            |
| GMT (95%CI) |                   |             | 377 (216-657)  | 390 (227-671)  | 280 (163-482) | 284 (160-505) |               |
|             |                   |             | <i>p value</i> | 0.702          | 0.188         | 0.021         |               |
| C           | 64                | n           | 50             | 50             | 64            | 50            |               |
|             |                   | GMT (95%CI) | 201 (133-305)  | 209 (136-321)  | 481 (320-724) | 215 (140-329) |               |
|             |                   |             | <i>p value</i> | <0.001         | <0.001        | <0.001        |               |
| D           | 66                | n           | 63             | 64             | 60            | 64            |               |
|             |                   | GMT (95%CI) | 318 (220-459)  | 335 (238-472)  | 284 (200-404) | 330 (235-464) |               |
|             |                   |             | <i>p value</i> | 0.837          | 0.636         | 0.483         |               |
| HPV18       | A                 | 36          | n              | 36             | 35            | 35            |               |
|             |                   |             | GMT (95%CI)    | 275 (183-414)  | 271 (174-421) | 228 (150-347) |               |
|             |                   |             |                | <i>p value</i> | 0.226         | 0.043         |               |
|             | B                 | 28          | n              | 27             | 27            | 27            |               |
| GMT (95%CI) |                   |             | 165 (125-216)  | 168 (130-216)  | 146 (114-188) |               |               |
|             |                   |             | <i>p value</i> | 0.802          | 0.001         |               |               |
|             | C                 | 0           | n              |                |               |               |               |
|             |                   |             | GMT (95%CI)    | N/A            | N/A           | N/A           |               |
|             |                   |             | <i>p value</i> |                |               |               |               |
| HPV31       | A                 | 54          | n              | 51             | 53            | 50            |               |
|             |                   |             | GMT (95%CI)    | 241 (180-324)  | 221 (172-285) | 196 (148-260) |               |
|             |                   |             |                | <i>p value</i> | 0.115         | 0.024         |               |
|             | B                 | 44          | n              | 40             | 42            | 42            |               |
| GMT (95%CI) |                   |             | 176 (129-240)  | 181 (134-246)  | 188 (137-257) |               |               |
|             |                   |             | <i>p value</i> | 0.556          | 0.401         |               |               |
| C           | 47                | n           | 45             | 45             | 47            |               |               |
|             |                   | GMT (95%CI) | 159 (125-203)  | 175 (137-224)  | 231 (182-294) |               |               |
|             |                   |             | <i>p value</i> | <0.001         | <0.001        |               |               |
| HPV33       | A                 | 69          | n              | 66             | 49            | 38            |               |
|             |                   |             | GMT (95%CI)    | 381 (265-548)  | 132 (93-187)  | 89 (63-127)   |               |
|             |                   |             |                | <i>p value</i> | <0.001        | <0.001        |               |
|             | B                 | 10          | n              | 6              | 9             | 8             |               |
| GMT (95%CI) |                   |             | 91 (34-245)    | 331 (119-923)  | 188 (65-543)  |               |               |
|             |                   |             | <i>p value</i> | 0.017          | 0.032         |               |               |
| C           | 4                 | n           | 3              | 3              | 3             |               |               |
|             |                   | GMT (95%CI) | 163 (14-1864)  | 155 (14-1682)  | 150 (9-2644)  |               |               |
|             |                   |             | <i>p value</i> | 0.465          | 0.853         |               |               |
| HPV45       | A                 | 17          | n              | 17             | 14            |               |               |
|             |                   |             | GMT (95%CI)    | 180 (134-241)  | 110 (71-170)  |               |               |
|             |                   |             |                | <i>p value</i> | 0.040         |               |               |
|             | B                 | 19          | n              | 18             | 18            |               |               |
| GMT (95%CI) |                   |             | 232 (135-398)  | 218 (133-357)  |               |               |               |
|             |                   |             | <i>p value</i> | 0.520          |               |               |               |
| HPV52       | A                 | 71          | n              | 68             | 64            | 69            | 50            |
|             |                   |             | GMT (95%CI)    | 266 (202-352)  | 154 (122-194) | 250 (196-318) | 91 (70-118)   |
|             |                   |             |                | <i>p value</i> | <0.001        | 0.006         | <0.001        |
|             | B                 | 17          | n              | 16             | 13            | 16            | 10            |
| GMT (95%CI) |                   |             | 235 (124-443)  | 124 (67-228)   | 197 (110-355) | 97 (44-213)   |               |
|             |                   |             | <i>p value</i> | 0.004          | 0.008         | 0.905         |               |
| C           | 18                | n           | 18             | 16             | 18            | 11            |               |
|             |                   | GMT (95%CI) | 346 (189-629)  | 127 (69-235)   | 297 (172-510) | 72 (42-123)   |               |
|             |                   |             | <i>p value</i> | 0.199          | <0.001        | <0.001        |               |
| D           | 10                | n           | 7              | 7              | 7             | 9             |               |
|             |                   | GMT (95%CI) | 119 (47-301)   | 102 (44-240)   | 112 (45-276)  | 300 (127-705) |               |
|             |                   |             | <i>p value</i> | 0.203          | 0.059         | 0.169         |               |
| HPV58       | A                 | 63          | n              | 63             | 58            | 10            | 62            |
|             |                   |             | GMT (95%CI)    | 386 (287-520)  | 270 (191-382) | 32 (27-37)    | 376 (276-511) |
|             |                   |             |                | <i>p value</i> | 0.203         | <0.001        | 0.686         |
|             | B                 | 9           | n              | 6              | 7             | 4             | 6             |
| GMT (95%CI) |                   |             | 94 (32-282)    | 108 (36-329)   | 47 (26-85)    | 97 (31-304)   |               |
|             |                   |             | <i>p value</i> | 0.550          | 0.260         | 0.403         |               |
| C           | 8                 | n           | 7              | 6              | 6             | 5             |               |
|             |                   | GMT (95%CI) | 133 (64-275)   | 108 (46-254)   | 141 (52-379)  | 84 (36-197)   |               |
|             |                   |             | <i>p value</i> | 0.575          | 0.401         | 0.263         |               |
| D           | 4                 | n           | 2              | 2              | 2             | 2             |               |
|             |                   | GMT (95%CI) | 57 (8-384)     | 53 (13-214)    | 74 (10-544)   | 67 (8-559)    |               |
|             |                   |             | <i>p value</i> | 0.353          | 0.842         | 0.853         |               |

N, number of sera positive for antibodies against any lineage antigen; n, number of sera positive for antibodies against indicated antigen; GMT, geometric mean (95%CI) neutralization titer; N/A, not applicable; *p value*, Wilcoxon paired rank test (2-sided, exact *p values*).

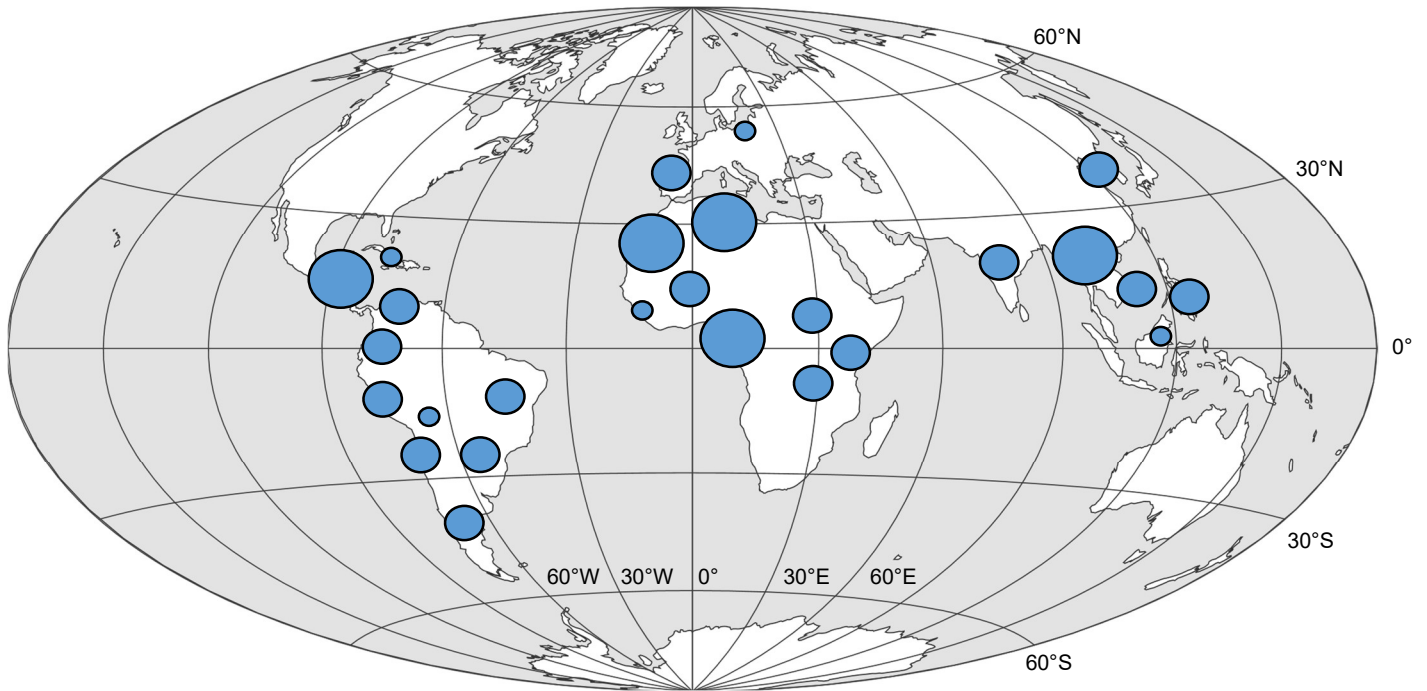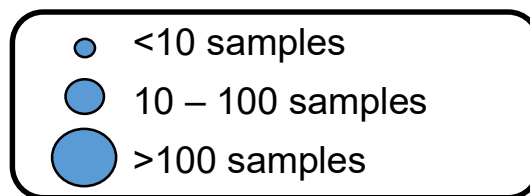

| Region   | Country     | 16A | 16B | 16C | 16D | 18A | 18B | 18C | 31A | 31B | 31C | 33A | 33B | 33C | 45A | 45B | 52A | 52B | 52C | 52D | 58A | 58B | 58C | 58D | Total |    |
|----------|-------------|-----|-----|-----|-----|-----|-----|-----|-----|-----|-----|-----|-----|-----|-----|-----|-----|-----|-----|-----|-----|-----|-----|-----|-------|----|
| Africa   | Algeria     | 21  | 15  | 23  | 17  | 13  | 1   | 1   |     |     | 5   | 1   |     |     | 4   | 4   | 1   |     |     |     |     |     |     |     | 106   |    |
| Africa   | Guinea      | 2   | 3   |     |     |     |     |     |     |     |     |     | 1   |     | 1   |     |     |     |     |     |     |     |     |     |       | 7  |
| Africa   | Kenya       | 2   | 6   | 31  |     | 3   | 12  |     |     | 1   | 1   | 2   |     |     | 8   | 3   | 2   | 1   |     |     |     |     |     | 3   | 75    |    |
| Africa   | Mali        | 4   | 24  | 15  |     | 4   | 9   | 3   |     |     | 1   |     |     | 1   | 9   | 2   | 2   |     |     |     |     |     | 4   | 2   | 1     | 81 |
| Africa   | Morocco     | 12  | 25  | 47  | 10  | 19  | 1   |     | 3   |     | 6   | 3   |     |     | 2   | 4   | 4   |     |     |     |     |     | 1   |     | 137   |    |
| Africa   | Nigeria     | 5   | 9   | 14  |     | 1   | 13  |     | 1   |     | 22  | 1   | 1   | 1   | 11  | 2   | 14  |     |     |     | 4   | 6   | 10  | 2   | 117   |    |
| Africa   | Tanzania    |     | 12  | 5   |     |     | 6   |     |     |     |     | 1   |     |     | 3   |     | 1   |     |     |     |     |     |     |     | 28    |    |
| Africa   | Uganda      |     | 12  | 5   | 1   |     | 3   |     |     |     |     |     | 1   |     | 2   |     |     |     |     |     |     |     |     |     | 24    |    |
| Americas | Argentina   | 15  |     | 1   | 8   | 7   |     |     | 5   | 5   | 11  | 3   |     |     |     | 3   | 11  |     | 1   |     | 6   |     |     |     | 76    |    |
| Americas | Bolivia     |     |     |     | 1   |     | 1   |     | 3   | 2   | 1   |     |     |     | 2   | 1   | 1   |     |     |     |     |     |     |     | 12    |    |
| Americas | Brazil      | 5   |     | 3   | 24  | 12  | 1   |     | 7   |     |     | 6   |     |     | 2   | 5   | 1   |     |     |     | 9   |     |     |     | 75    |    |
| Americas | Chile       |     |     |     | 5   |     |     |     |     | 5   | 1   | 5   |     |     | 1   | 3   | 3   | 1   |     |     |     |     |     |     | 24    |    |
| Americas | Colombia    |     |     |     |     | 2   |     |     | 13  | 1   |     | 3   |     |     |     |     |     |     |     |     | 3   |     |     |     | 22    |    |
| Americas | Costa Rica  |     | 4   |     | 9   | 47  | 74  |     | 76  | 121 | 82  | 82  | 25  | 10  | 69  | 102 | 87  | 5   | 15  | 12  | 81  |     | 5   | 12  | 918   |    |
| Americas | Cuba        |     | 1   |     | 3   |     | 1   |     | 1   |     | 1   |     |     |     | 3   | 1   | 1   |     |     |     | 2   |     |     |     | 8     |    |
| Americas | Panama      |     | 1   | 2   | 3   |     | 3   |     | 1   |     | 1   |     |     |     | 3   | 2   | 1   |     |     | 1   | 2   |     |     |     | 20    |    |
| Americas | Paraguay    |     |     |     | 3   |     |     |     | 1   | 1   | 2   | 5   |     |     | 2   | 1   | 1   |     |     |     |     | 1   |     |     | 16    |    |
| Americas | Peru        | 17  |     |     | 31  | 10  |     |     | 15  | 3   |     | 2   |     |     | 3   |     | 8   |     | 6   |     | 4   |     |     |     | 99    |    |
| Asia     | India       | 13  |     |     | 2   | 13  |     |     |     |     | 2   | 6   |     |     | 3   | 2   |     | 2   |     |     | 4   |     |     |     | 47    |    |
| Asia     | Indonesia   |     |     |     |     |     |     |     |     |     |     |     |     |     | 1   | 3   |     |     |     |     |     |     |     |     | 4     |    |
| Asia     | Korea       | 5   |     |     |     | 4   |     |     | 1   |     |     | 5   |     |     |     | 1   |     | 3   |     | 1   | 5   |     |     |     | 25    |    |
| Asia     | Philippines | 10  | 1   | 2   | 5   | 27  | 1   |     | 4   |     |     |     |     |     | 23  | 5   | 3   | 8   | 1   |     | 9   |     |     |     | 99    |    |
| Asia     | Thailand    | 33  |     | 7   | 27  | 29  |     |     | 13  | 1   |     | 6   |     |     | 4   |     | 1   | 9   | 13  | 2   | 13  | 1   |     | 1   | 160   |    |
| Asia     | Vietnam     | 8   |     |     |     | 4   |     |     | 2   |     |     | 6   |     |     |     |     | 3   | 6   |     |     | 8   |     | 1   |     | 38    |    |
| Europe   | Poland      |     |     |     |     |     |     |     |     | 1   | 1   |     |     |     |     |     |     |     |     |     |     |     |     |     | 2     |    |
| Europe   | Spain       |     |     |     | 6   | 2   |     |     | 2   | 5   | 2   | 12  |     |     | 1   | 1   | 1   |     | 2   |     | 1   |     |     |     | 35    |    |
|          | Total       | 150 | 112 | 158 | 155 | 197 | 126 | 4   | 148 | 145 | 138 | 149 | 28  | 12  | 150 | 149 | 146 | 35  | 38  | 16  | 149 | 13  | 18  | 19  | 2255  |    |

**Supplementary Figure 1** Geographical distribution of samples included in this study

Top panel, world map with 30° indicative latitude and longitude grid (Tentotwo; 1:110m Natural Earth Datasets CC BY-SA 3.0; <https://commons.wikimedia.org/w/index.php?curid=21507855>) highlighting geographical dispersal and approximate number of samples included within this collection. Bottom panel, numbers of samples representing each region, country, type and lineage in this study, where each cell contains *n* number of samples with green intensity reflecting the proportion within the collection.

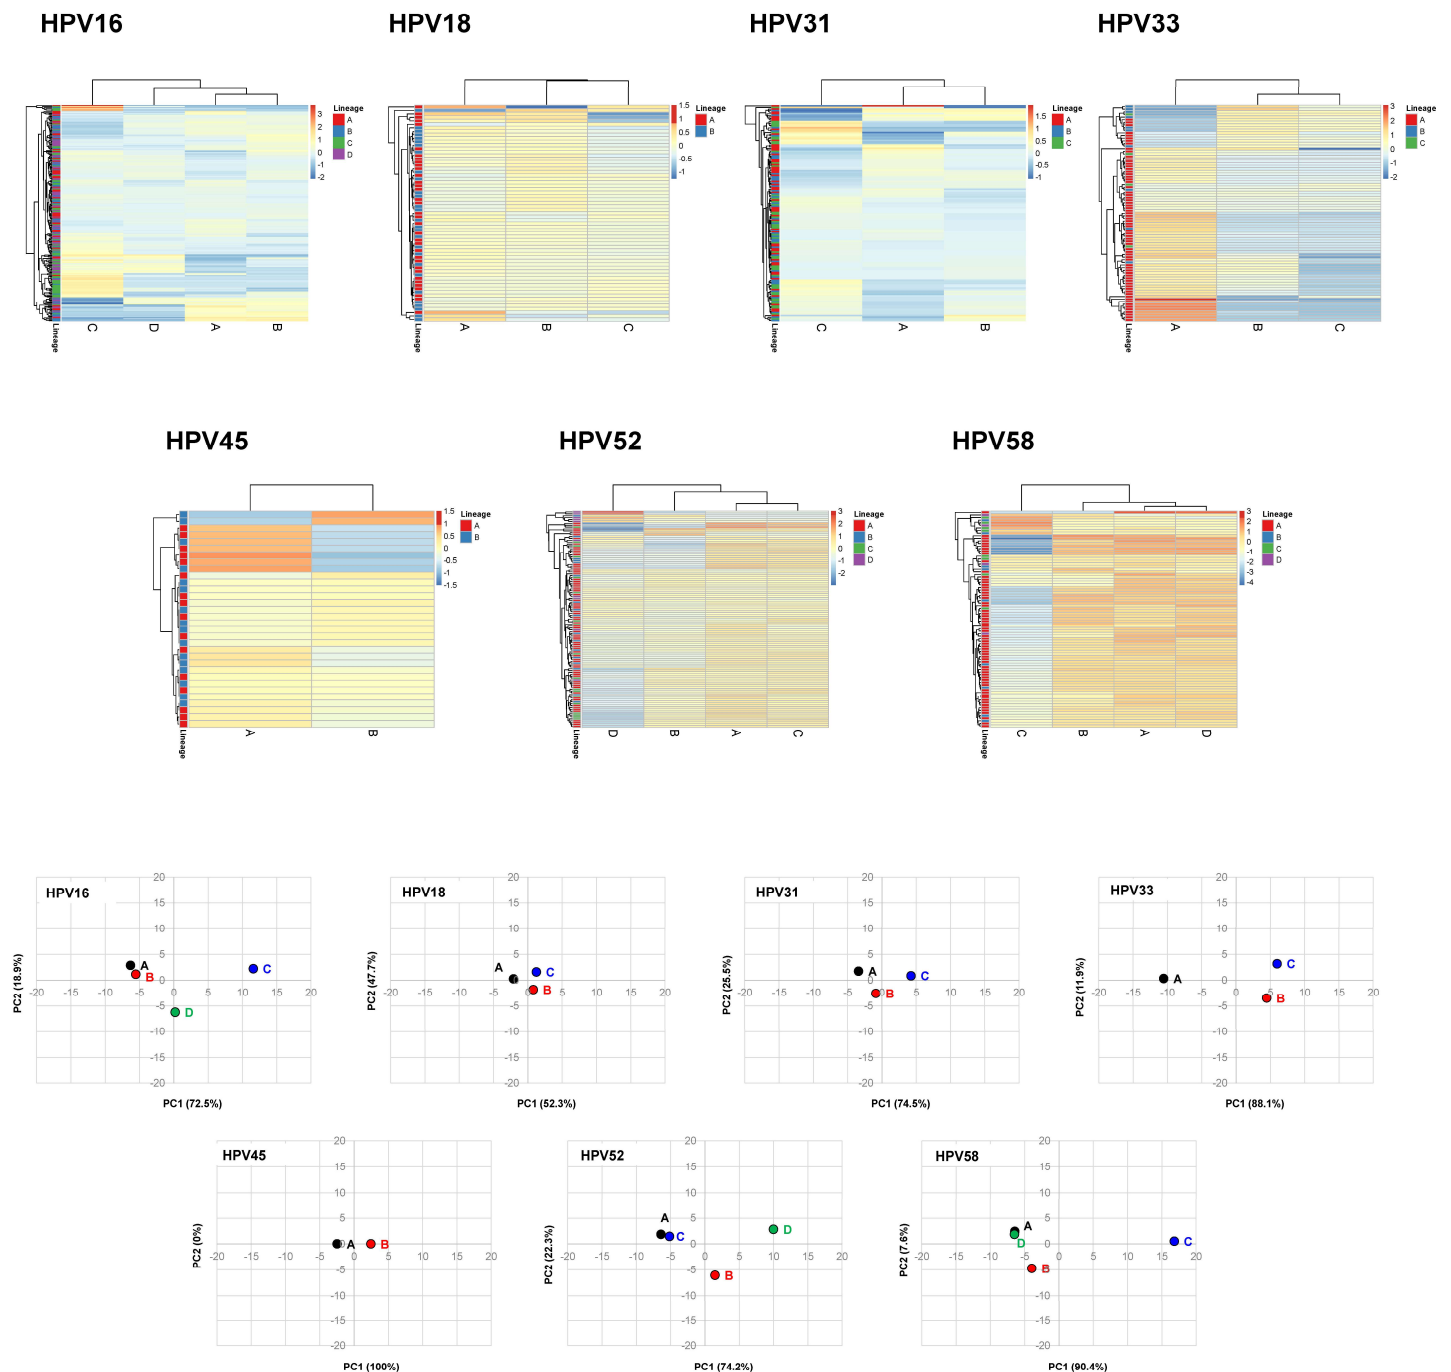

### Supplementary Figure 2 Use of additional antigen clustering tools

Top panel, hierarchical clustering and heatmap using indicated relative scale. Natural log neutralizing antibody titers were reordered according to serological and antigen dendrograms constructed from the resulting Euclidean distance matrices. Serum side bar denotes natural infection lineage from which serum (or plasma) sample derived according to key. Bottom panel, principal component analysis to define relative antigen position in two-dimensional space: lineage A (black), B (red), C (blue) and D (green). The PC1 and PC2 channels accounted for the majority of the variance across these datasets as indicated: HPV16 (91%), HPV18 (100%), HPV31 (100%), HPV33 (100%), HPV45 (100%), HPV52 (97%), HPV58 (98%). Both analyses made use of the ClustVis web tool (<https://biit.cs.ut.ee/clustvis/>).

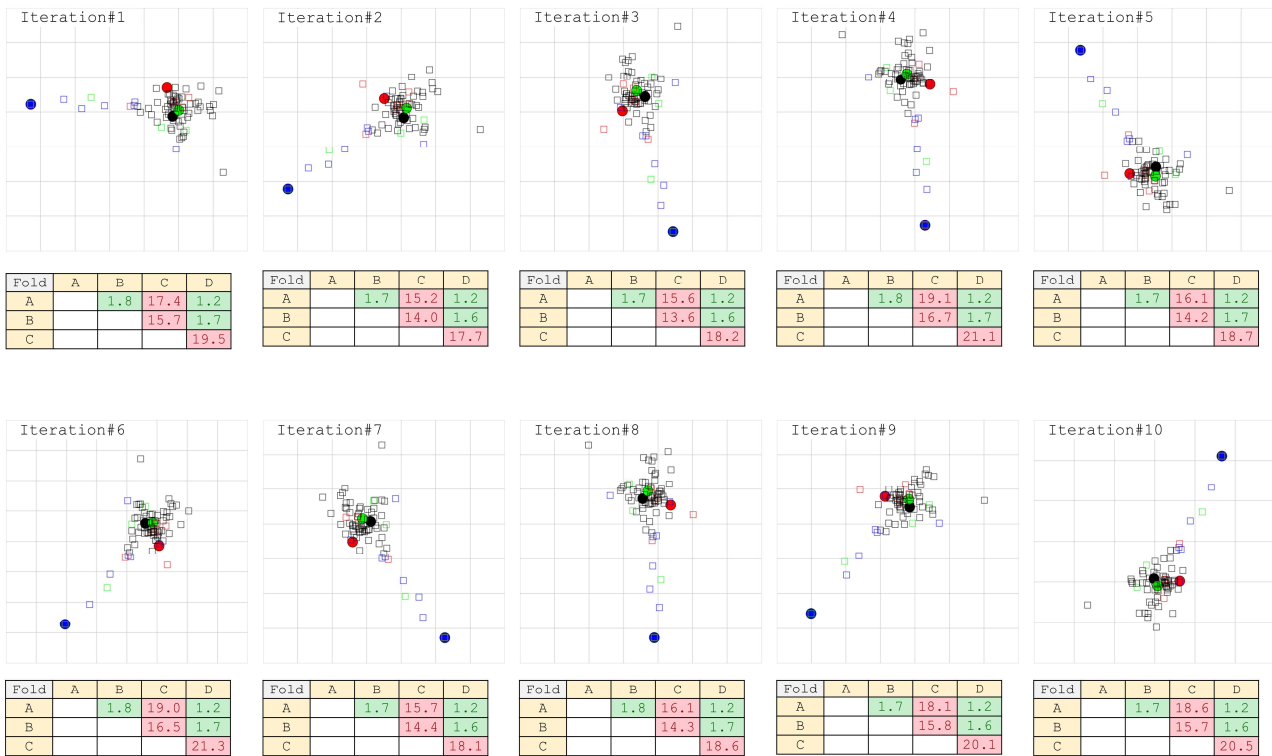

| Mean (95%CI) | A | B                | C                   | D                   |
|--------------|---|------------------|---------------------|---------------------|
| A            |   | 1.7<br>1.7 - 1.8 | 17.0<br>16.1 - 18.0 | 1.2<br>1.2 - 1.2    |
| B            |   |                  | 15.0<br>14.3 - 15.7 | 1.7<br>1.6 - 1.7    |
| C            |   |                  |                     | 19.3<br>18.5 - 20.2 |

| Full dataset |      |     |      |      |
|--------------|------|-----|------|------|
|              | Fold | B   | C    | D    |
| 16           | A    | 1.2 | 2.7  | 1.9  |
|              | B    |     | 2.6  | 1.7  |
|              | C    |     |      | 2.0  |
| 18           | A    | 1.3 | 1.4  |      |
|              | B    |     | 1.3  |      |
| 31           | A    | 1.3 | 1.6  |      |
|              | B    |     | 1.4  |      |
| 33           | A    | 4.2 | 5.9  |      |
|              | B    |     | 1.7  |      |
| 52           | A    | 2.3 | 1.1  | 3.9  |
|              | B    |     | 2.2  | 3.5  |
|              | C    |     |      | 3.6  |
| 58           | A    | 1.7 | 17.2 | 1.2  |
|              | B    |     | 15.7 | 1.7  |
|              | C    |     |      | 19.8 |

| Mean iterations (n=10) |      |     |      |      |
|------------------------|------|-----|------|------|
|                        | Fold | B   | C    | D    |
| 16                     | A    | 1.2 | 2.7  | 2.0  |
|                        | B    |     | 2.6  | 1.7  |
|                        | C    |     |      | 2.0  |
| 18                     | A    | 1.3 | 1.4  |      |
|                        | B    |     | 1.3  |      |
| 31                     | A    | 1.3 | 1.6  |      |
|                        | B    |     | 1.4  |      |
| 33                     | A    | 4.2 | 5.9  |      |
|                        | B    |     | 1.7  |      |
| 52                     | A    | 2.3 | 1.1  | 3.8  |
|                        | B    |     | 2.2  | 3.4  |
|                        | C    |     |      | 3.6  |
| 58                     | A    | 1.7 | 17.0 | 1.2  |
|                        | B    |     | 15.0 | 1.7  |
|                        | C    |     |      | 19.3 |

**Supplementary Figure 3 Resampling of 90% of neutralization data for antigenic cartography iterations**

To test the robustness of the antigenic mapping for each genotype a 10% data redaction method was employed. The dataset for each genotype was subjected to 10 such randomizations (iterations) creating 10 pseudo-replicate antigenic maps. An example using HPV58 is shown with lineages coded as follows: A, black; B, red; C, blue; D, green. Antigenic distances between antigens were summarized as the mean (95%CI). Comparisons of mean distances for the full dataset and the iterative dataset are summarized. Fold difference between indicated antigens shown with <2-fold (green), 2-4 fold (gold) and >4 fold (red) differences highlighted as indicated. Analysis restricted to genotypes with >2 lineages for comparability, thus does not include HPV45.

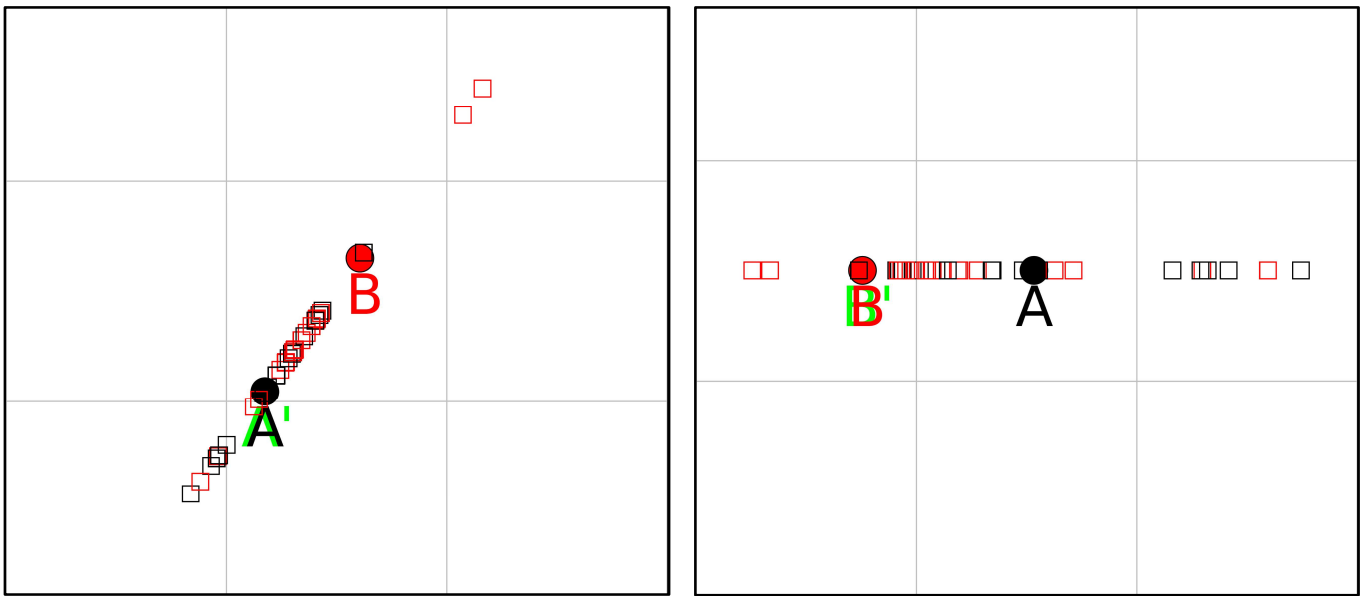

**Supplementary Figure 4** *Antigenic mapping of HPV45 lineage A and B pseudovirus antigens*

To estimate the antigenic distance between lineage antigens A and B, a dummy dataset was included in each map based upon a copy of lineage A (A', left panel) or lineage B data (B', right panel). Lineage antigens A (black), B (red) and A'/B' copy (green) as indicated.

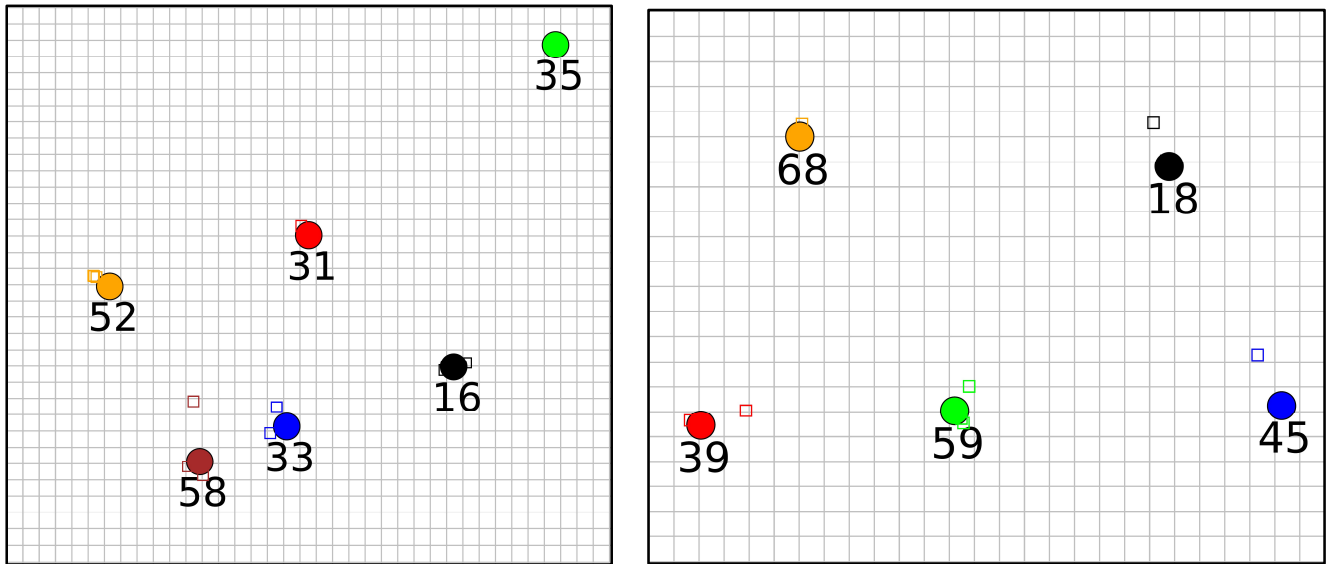

**Supplementary Figure 5** *Antigenic mapping of type-specific rabbit neutralizing antibody responses*

Left panel, Alpha-9 types (HPV16, 18, 31, 33, 35, 52 and 58) and right panel, Alpha-7 types (HPV18, 39, 45, 59 and 68). Filled circles and open squares represent type-specific pseudovirus antigens and rabbit sera ( $n=3$  per type), respectively, and are similarly colored for each type. In each antigenic map the grey grid squares represent 1 antigenic unit (AU), which is equivalent to a 2-fold distance; thus, three grid squares is equivalent to an 8-fold ( $2^3$ ) distance.

| Genotype | Total | Single | Dual | Multiple |
|----------|-------|--------|------|----------|
| HPV16    | 575   | 541    | 31   | 3        |
| HPV18    | 327   | 295    | 32   | 0        |
| HPV31    | 431   | 392    | 38   | 1        |
| HPV33    | 189   | 169    | 16   | 4        |
| HPV45    | 299   | 279    | 18   | 2        |
| HPV52    | 235   | 204    | 27   | 4        |
| HPV58    | 199   | 165    | 30   | 4        |
| Total    | 2255  | 2045   | 192  | 18       |
| %        | 100%  | 90.7%  | 8.5% | 0.8%     |

| Full dataset |      |     |      |      | Single infections only |      |     |      |      |
|--------------|------|-----|------|------|------------------------|------|-----|------|------|
|              | Fold | B   | C    | D    |                        | Fold | B   | C    | D    |
| 16           | A    | 1.2 | 2.7  | 1.9  | 16                     | A    | 1.2 | 2.7  | 2.0  |
|              | B    |     | 2.6  | 1.7  |                        | B    |     | 2.6  | 1.7  |
|              | C    |     |      | 2.0  |                        | C    |     |      | 2.0  |
| 18           | A    | 1.3 | 1.4  |      | 18                     | A    | 1.3 | 1.4  |      |
|              | B    |     | 1.3  |      |                        | B    |     | 1.3  |      |
| 31           | A    | 1.3 | 1.6  |      | 31                     | A    | 1.3 | 1.6  |      |
|              | B    |     | 1.4  |      |                        | B    |     | 1.4  |      |
| 33           | A    | 4.2 | 5.9  |      | 33                     | A    | 4.4 | 6.3  |      |
|              | B    |     | 1.7  |      |                        | B    |     | 1.8  |      |
| 52           | A    | 2.3 | 1.1  | 3.9  | 52                     | A    | 2.4 | 1.1  | 4.0  |
|              | B    |     | 2.2  | 3.5  |                        | B    |     | 2.4  | 3.8  |
|              | C    |     |      | 3.6  |                        | C    |     |      | 3.7  |
| 58           | A    | 1.7 | 17.2 | 1.2  | 58                     | A    | 1.7 | 18.8 | 1.2  |
|              | B    |     | 15.7 | 1.7  |                        | B    |     | 18.1 | 1.6  |
|              | C    |     |      | 19.8 |                        | C    |     |      | 21.6 |

**Supplementary Figure 6** Assessment of antigenic distance using single vs. mixed infection samples

Top panel, a small number of DNA samples exhibited mixed infections. Additional coded serum samples were included to account for this multiplicity. Bottom panel, a subset analysis was conducted where the antigenic distances were estimated for those samples derived from single infections only and a comparison made with those that included all samples. Fold difference between indicated antigens shown with <2-fold (green), 2-4 fold (gold) and >4 fold (red) differences highlighted as indicated. Analysis was restricted to genotypes with >2 lineages for comparability, thus does not include HPV45.



| Impact analysis                                                      | Samples (n)                                                            | Fold | B   | C   | D   |
|----------------------------------------------------------------------|------------------------------------------------------------------------|------|-----|-----|-----|
| <i>Original dataset</i>                                              | <i>n=226 seropositive samples</i>                                      | A    | 1.2 | 2.7 | 1.9 |
|                                                                      |                                                                        | B    |     | 2.6 | 1.7 |
|                                                                      |                                                                        | C    |     |     | 2.0 |
| <i>Impact of geographical origin on antigenic distance estimates</i> | <i>Asia and the Americas (n=87; no samples from Africa or Europe)</i>  | A    | 1.3 | 2.3 | 1.9 |
|                                                                      |                                                                        | B    |     | 2.0 | 1.4 |
|                                                                      |                                                                        | C    |     |     | 1.6 |
|                                                                      | <i>Africa and Asia (n=164; no samples from the Americas or Europe)</i> | A    | 1.1 | 2.8 | 1.9 |
|                                                                      |                                                                        | B    |     | 2.8 | 1.8 |
|                                                                      |                                                                        | C    |     |     | 2.2 |
|                                                                      | <i>Africa and the Americas (n=189; no samples from Asia or Europe)</i> | A    | 1.3 | 2.9 | 2.1 |
|                                                                      |                                                                        | B    |     | 2.7 | 1.7 |
|                                                                      |                                                                        | C    |     |     | 2.1 |
|                                                                      | <i>Africa only (n=133)</i>                                             | A    | 1.1 | 3.1 | 2.0 |
|                                                                      |                                                                        | B    |     | 3.0 | 1.9 |
|                                                                      |                                                                        | C    |     |     | 2.4 |
|                                                                      | <i>The Americas only (n=56)</i>                                        | A    | 1.4 | 2.5 | 2.0 |
|                                                                      |                                                                        | B    |     | 2.1 | 1.4 |
|                                                                      |                                                                        | C    |     |     | 1.7 |
|                                                                      | <i>Asia and Europe only (n=37)</i>                                     | A    | 1.2 | 2.0 | 1.5 |
|                                                                      |                                                                        | B    |     | 1.8 | 1.6 |
|                                                                      |                                                                        | C    |     |     | 1.4 |
| <i>Impact of seropositivity rate on antigenic distance estimates</i> | <i>Reduced lineage A samples (n=27/46; n=207 total samples)</i>        | A    | 1.2 | 2.6 | 1.9 |
|                                                                      |                                                                        | B    |     | 2.6 | 1.6 |
|                                                                      |                                                                        | C    |     |     | 2.0 |
|                                                                      | <i>Reduced lineage B samples (n=19/50; n=195 total samples)</i>        | A    | 1.2 | 2.6 | 2.0 |
|                                                                      |                                                                        | B    |     | 2.5 | 1.6 |
|                                                                      |                                                                        | C    |     |     | 1.9 |
|                                                                      | <i>Reduced lineage C samples (n=32/64; n=194 total samples)</i>        | A    | 1.3 | 2.5 | 1.9 |
|                                                                      |                                                                        | B    |     | 2.4 | 1.6 |
|                                                                      |                                                                        | C    |     |     | 1.8 |
|                                                                      | <i>Reduced lineage D samples (n=30/66; n=190 total samples)</i>        | A    | 1.2 | 2.7 | 2.0 |
|                                                                      |                                                                        | B    |     | 2.6 | 1.7 |
|                                                                      |                                                                        | C    |     |     | 2.1 |

**Supplementary Figure 7** *Impact assessment of geographic origin and seropositivity rate on antigenic distance*

Estimates of antigenic distance between HPV16 lineage antigens following inclusion of samples from indicated geographical regions and following removal of ca. 50% of seropositive samples to simulate a lower seropositivity rate for the indicated lineages compared to the original dataset. Fold difference between indicated antigens shown with <2-fold (green), 2-4 fold (gold) and >4 fold (red) differences highlighted as indicated.

| Method                                                  | Type  | N                             | Fold | B                  | C                     | D                     |
|---------------------------------------------------------|-------|-------------------------------|------|--------------------|-----------------------|-----------------------|
| Original dataset                                        | HPV33 | A=69<br>B=10<br>C=4           | A    | 4.2                | 5.9                   |                       |
|                                                         |       |                               | B    |                    | 1.7                   |                       |
|                                                         |       |                               | C    |                    |                       |                       |
|                                                         | HPV52 | A=71<br>B=17<br>C=18<br>D=10  | A    | 2.3                | 1.1                   | 3.9                   |
|                                                         |       |                               | B    |                    | 2.2                   | 3.5                   |
|                                                         |       |                               | C    |                    |                       | 3.6                   |
|                                                         | HPV58 | A=63<br>B=9<br>C=8<br>D=4     | A    | 1.7                | 17.2                  | 1.2                   |
|                                                         |       |                               | B    |                    | 15.7                  | 1.7                   |
|                                                         |       |                               | C    |                    |                       | 19.8                  |
| Proportionate randomized resampling with replacement    | HPV33 | A=127<br>B=17<br>C=7          | A    | 4.1<br>(3.8 – 4.4) | 5.9<br>(5.5 – 6.3)    |                       |
|                                                         |       |                               | B    |                    | 1.8<br>(1.7 – 1.8)    |                       |
|                                                         |       |                               | C    |                    |                       |                       |
|                                                         | HPV52 | A=125<br>B=28<br>C=29<br>D=18 | A    | 2.2<br>(2.2 – 2.3) | 1.1<br>(1.0 – 1.1)    | 3.8<br>(3.6 – 3.9)    |
|                                                         |       |                               | B    |                    | 2.2<br>(2.1 – 2.3)    | 3.6<br>(3.4 – 3.8)    |
|                                                         |       |                               | C    |                    |                       | 3.6<br>(3.5 – 3.7)    |
|                                                         | HPV58 | A=147<br>B=23<br>C=20<br>D=10 | A    | 1.7<br>(1.6 – 1.8) | 16.2<br>(14.7 – 17.7) | 1.2<br>(1.2 – 1.3)    |
|                                                         |       |                               | B    |                    | 14.5<br>(12.8 – 16.2) | 1.7<br>(1.6 – 1.8)    |
|                                                         |       |                               | C    |                    |                       | 18.9<br>(17.0 – 20.9) |
| Disproportionate randomized resampling with replacement | HPV33 | A=50<br>B=50<br>C=50          | A    | 4.3<br>(4.1 – 4.5) | 4.8<br>(4.6 – 5.0)    |                       |
|                                                         |       |                               | B    |                    | 1.5<br>(1.4 – 1.5)    |                       |
|                                                         |       |                               | C    |                    |                       |                       |
|                                                         | HPV52 | A=50<br>B=50<br>C=50<br>D=50  | A    | 2.3<br>(2.3 – 2.4) | 1.1<br>(1.0 – 1.1)    | 4.1<br>(3.9 – 4.3)    |
|                                                         |       |                               | B    |                    | 2.3<br>(2.2 – 2.4)    | 4.0<br>(3.8 – 4.3)    |
|                                                         |       |                               | C    |                    |                       | 3.9<br>(3.8 – 4.1)    |
|                                                         | HPV58 | A=50<br>B=50<br>C=50<br>D=50  | A    | 1.8<br>(1.8 – 1.9) | 8.1<br>(7.6 – 8.6)    | 1.3<br>(1.3 – 1.4)    |
|                                                         |       |                               | B    |                    | 6.2<br>(5.9 – 6.5)    | 1.8<br>(1.7 – 1.9)    |
|                                                         |       |                               | C    |                    |                       | 9.5<br>(8.9 – 10.2)   |

**Supplementary Figure 8** Antigenic distance estimates following randomized resampling with replacement

Estimates of antigenic distance (mean, 95%CI) between lineage antigens following two randomized resampling with replacement evaluations compared to the original dataset. The proportionate randomized resampling with replacement randomly selected samples from the type-specific dataset where N represents the mean number of samples for each lineage after 10 iterations and is expected to maintain the structure of the original dataset. The disproportionate randomized resampling with replacement randomly selected samples until a target of N=50 samples for each lineage was reached and therefore is not expected to retain the structure of the original dataset. Fold difference between indicated antigens shown with <2-fold (green), 2-4 fold (gold) and >4 fold (red) differences highlighted as indicated.
